1

2

## Soaring styles of extinct giant birds and pterosaurs

3

4

5 Authors:

6 Yusuke Goto<sup>1\*</sup>, Ken Yoda<sup>2</sup>, Henri Weimerskirch<sup>1</sup>, Katsufumi Sato<sup>3</sup>

7

8 Author Affiliation:

9 <sup>1</sup>*Centre d'Etudes Biologiques Chizé, CNRS – Université de la Rochelle, 79360 Villiers*  
10 *En Bois, France.*

11 <sup>2</sup>*Graduate School of Environmental Studies, Nagoya University, Furo, Chikusa,*  
12 *Nagoya, Japan.*

13 <sup>3</sup>*Atmosphere and Ocean Research Institute, The University of Tokyo, Chiba, Japan.*

14

15

16 Corresponding Author:

17 Yusuke Goto

18 *Centre d'Etudes Biologiques Chizé, CNRS – Université de la Rochelle, 79360 Villiers*  
19 *En Bois, France.*

20 e-mail: [goto924@gmail.com](mailto:goto924@gmail.com)

21 TEL: +814-7136-6220

22

23

24 Keywords:

25 birds, pterosaurs, soaring performance, wind, dynamic soaring, thermal soaring

26

27

28

## 29 **Summary**

30 The largest extinct volant birds (*Pelagornis sandersi* and *Argentavis magnificens*) and pterosaurs  
31 (*Pteranodon* and *Quetzalcoatlus*) are thought to have used wind-dependent soaring flight, similar to  
32 modern large birds. There are two types of soaring: thermal soaring, used by condors and frigatebirds,  
33 which involves the use of updrafts over the land or the sea to ascend and then glide horizontally; and  
34 dynamic soaring, used by albatrosses, which involves the use of wind speed differences with height above  
35 the sea surface. Previous studies have suggested that *Pelagornis sandersi* used dynamic soaring, while  
36 *Argentavis magnificens*, *Pteranodon*, and *Quetzalcoatlus* used thermal soaring. However, the  
37 performance and wind speed requirements of dynamic and thermal soaring for these species have not yet  
38 been quantified comprehensively. We quantified these values using aerodynamic models and compared  
39 them with that of extant birds. For dynamic soaring, we quantified maximum flight speeds and maximum  
40 upwind flight speeds. For thermal soaring, we quantified the animal's sinking speed circling at a given  
41 radius and how far it could glide losing a given height. Our results confirmed those from previous studies  
42 that *Pteranodon* and *Argentavis magnificens* used thermal soaring. Conversely, the results for *Pelagornis*  
43 *sandersi* and *Quetzalcoatlus* were contrary to those from previous studies. *Pelagornis sandersi* used  
44 thermal soaring, and *Quetzalcoatlus* had a poor ability both in dynamic and thermal soaring. Our results  
45 demonstrate the need for comprehensive assessments of performance and required wind conditions when  
46 estimating soaring styles of extinct flying species.

47

48

## 49 **Introduction**

50 Flying animals have evolved a wide range of body sizes. Among them, there have been incredibly large  
51 species of birds and pterosaurs (Fig. 1). *Pelagornis sandersi* and *Argentavis magnificens* are the largest  
52 extinct volant birds. Their estimated wingspans reached 6–7 m (1–4), twice as large as that of the  
53 wandering albatross, the extant bird with the longest wingspan (Table 1). Several large species of  
54 pterosaurs appeared in the Cretaceous period. *Pteranodon*, presumably the most famous pterosaur, is  
55 estimated to have had a wingspan of 6 m (Table 1) (5). The azhdarchids are one of the most successful  
56 Cretaceous pterosaur groups and include many large species with wingspans of approximately 10 m  
57 (Table 1) (6–9). *Quetzalcoatlus northropi*, one of the azhdarchid species, is regarded as one of the largest  
58 flying animals in history.

59 Discoveries of these giant winged animals have fascinated paleontologists and biologists for  
60 over a century. Their flight ability has been of great interest because their huge size must significantly  
61 affect their flight. With increasing size, the power required to fly increases faster than the power muscles

62

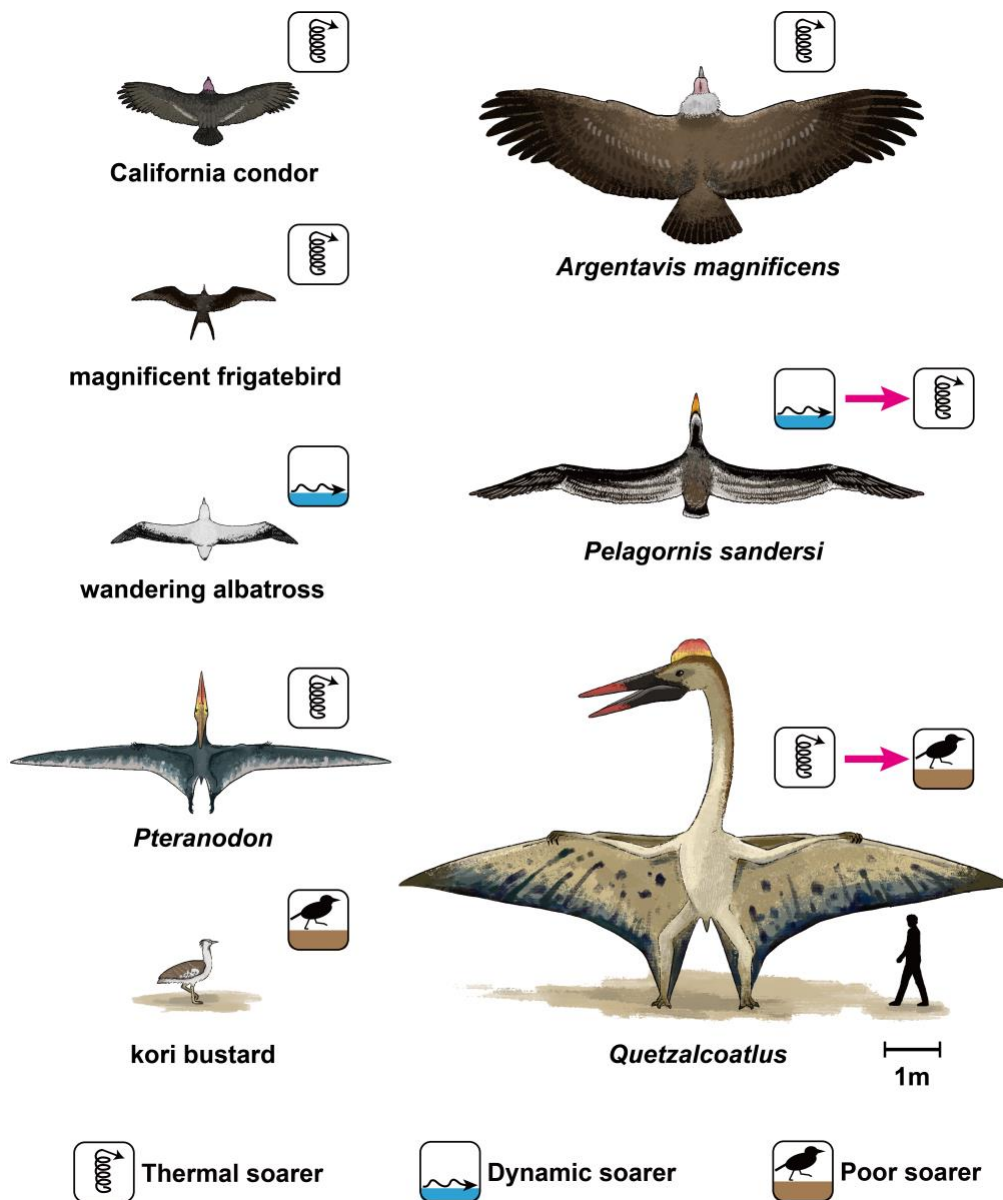

63

64

65 **Fig. 1.** A size comparison and soaring styles of extinct giant birds (*Pelagornis*  
 66 *sandersi* and *Argentavis magnificens*), pterosaurs (*Pteranodon* and  
 67 *Quetzalcoatlus*), the largest extant dynamic soaring bird (wandering albatross),  
 68 the largest extant thermal soaring terrestrial bird (California condor), the largest  
 69 extant thermal soaring seabird (magnificent frigatebird), and the heaviest extant  
 70 volant bird (kori bustard). The icons indicate dynamic soarer, thermal soarer,  
 71 and poor soarer and summarize the main results of this study. The red arrows  
 72 indicate the transition from a previous expectation or hypothesis to  
 73 the knowledge updated in this study.

74

| Species         |                                                               | Mass<br>(kg)         | Wingspan<br>(m)                 | Wing<br>area (m <sup>2</sup> ) | Aspect<br>ratio               | Wing loading                                                                | Ref   |
|-----------------|---------------------------------------------------------------|----------------------|---------------------------------|--------------------------------|-------------------------------|-----------------------------------------------------------------------------|-------|
| Extinct         | <i>Pelagornis sandersi</i>                                    | 21.8,<br>and<br>40.1 | 6.06, 6.13,<br>6.40 and<br>7.38 | 2.45<br>~<br>4.19              | 13.0,<br>14.0,<br>and<br>15.0 | 51.0 ~ 87.4<br>(with 21.8 kg Mass)<br><br>93.9 ~ 161<br>(with 40.1 kg Mass) | (1)   |
|                 | <i>Argentavis magnificens</i>                                 | 70.0                 | 7.00                            | 8.11                           | 6.04                          | 84.7                                                                        | (4)   |
|                 | <i>Pteranodon</i>                                             | 36.7                 | 5.96                            | 1.99                           | 17.9                          | 181                                                                         | (5)   |
|                 | <i>Quetzalcoatlus</i>                                         | 259                  | 9.64                            | 11.4                           | 8.18                          | 224                                                                         | (5)   |
| Dynamic soaring | wandering albatross<br>( <i>Diomedea exulans</i> )            | 8.64                 | 3.05                            | 0.606                          | 15.4                          | 140                                                                         | (47)* |
|                 | black-browed albatross<br>( <i>Thalassarche melanophris</i> ) | 3.55                 | 2.25                            | 0.376                          | 13.4                          | 87.5                                                                        | (48)* |
|                 | white-chinned petrel<br>( <i>Procellaria aequinoctialis</i> ) | 1.37                 | 1.40                            | 0.169                          | 11.6                          | 79.5                                                                        | (49)  |
| Thermal soaring | magnificent frigatebird<br>( <i>Fregata magnificens</i> )     | 1.52                 | 2.29                            | 0.408                          | 12.8                          | 36.5                                                                        | (18)  |
|                 | California condor<br>( <i>Gymnogyps californianus</i> )       | 9.50                 | 2.74                            | 1.32                           | 5.70                          | 70.6                                                                        | (4)   |
|                 | brown pelican<br>( <i>Pelecanus occidentalis</i> )            | 2.65                 | 2.10                            | 0.450                          | 9.80                          | 57.8                                                                        | (18)  |
|                 | black vulture<br>( <i>Coragyps atratus</i> )                  | 1.82                 | 1.38                            | 0.327                          | 5.82                          | 54.6                                                                        | (18)  |
|                 | white stork<br>( <i>Ciconia ciconia</i> )                     | 3.40                 | 2.18                            | 0.540                          | 7.42                          | 61.8                                                                        | (4)   |
| Non-Soaring     | kori bustard<br>( <i>Ardeotis kori</i> )                      | 11.9                 | 2.47                            | 1.06                           | 5.76                          | 110                                                                         | (17)  |

75

76

77 **Table 1.** Morphological values of examined species. \*For the wandering  
78 albatross and the black-browed albatross, we used the averages calculated  
79 from the morphological values of males and females in the cited references (47,  
80 48). For the kori bustard, we used the morphology data available in the *Flight*  
81 program (17).

82

83 are able to produce by flapping of wings. Hence, this physical constraint resulted in two  
84 heated arguments about the flight of extinct giants. The first is about whether and how they were able to  
85 take off (4, 10–12). The present study focused on the second debate. Due to the high costs of flapping that  
86 stems from their large body size, large extant birds prefer to fly utilizing wind energy or convection, that  
87 is, they prefer to soar (10, 13). Hence, it is presumed that extinct large animals also employed soaring  
88 flight as their primary mode of transportation (1, 4, 14). The second debate is about what kind of soaring  
89 flight style they employed (1, 4, 14–16).

90 There are two main soaring flight styles among extant birds: dynamic soaring and thermal  
91 soaring (17). In dynamic soaring, birds extract flight energy from wind shear—the vertical gradient in  
92 horizontal wind speed over the ocean (Fig. 2A). Extant seabirds (e.g., albatrosses, shearwaters, and  
93 petrels) employ this soaring style and can routinely travel hundreds of kilometers per day over the sea. In  
94 thermal soaring, birds first fly circling in warm rising-air columns (thermals). They climb to a substantial  
95 height and then glide off in the desired direction while losing their height (Fig. 2C-E). By repeating this  
96 up-down process, birds travel over vast distances. Various terrestrial bird species (e.g., vultures, eagles,  
97 and storks) and seabirds (e.g., frigatebirds and pelicans) employ thermal soaring.

98 This study investigated which soaring styles were employed by four large extinct species, that  
99 is, *Pelagornis sandersi*, *Argentavis magnificens*, *Pteranodon*, and *Quetzalcoatlus*. Their soaring  
100 capabilities were quantified using two factors. The first is performance, as the available speed and  
101 efficiency of soaring. The second is the minimum wind speed required for sustainable soaring flight.

102 For thermal soaring, performance was evaluated during the gliding and soaring up phases. In  
103 the gliding phase, a bird's performance is its glide ratio, which is the ratio of distance a bird traverses to  
104 the height the bird loses to cover that distance, i.e.,  $(\text{glide ratio}) = (\text{horizontal speed})/(\text{sinking speed})$  (Fig.  
105 2E). A bird with a higher glide ratio is more efficient as it can traverse a longer distance for the same  
106 amount of height lost as a bird with a lower glide ratio. Plotting a curve known as a 'glide polar' is the  
107 conventional method to quantify glide ratio and the associated speed in artificial gliders and birds (17).  
108 This curve is a plot of the sinking speed against horizontal speed when a bird glides in a straight line. We  
109 can determine the flyer's maximum glide ratio and the associated travel speed by finding the line that  
110 passes the origin and tangents of the glide polar. The inverse of the line's slope and the speed at the  
111 tangent point correspond to the maximum glide ratio and the associated horizontal speed, respectively.  
112 The performance in the soaring up phase is represented by the sinking speed during circling in a given  
113 radius. To achieve thermal soaring, a bird needs a higher upward wind speed than the circling bird's  
114 sinking speed (Fig. 2D). Because thermals have a stronger updraft in the center (Fig. 2C), the animal  
115 needs to achieve not only low sinking speed but also a narrow turning radius to efficiently ascend through  
116

## Dynamic soaring

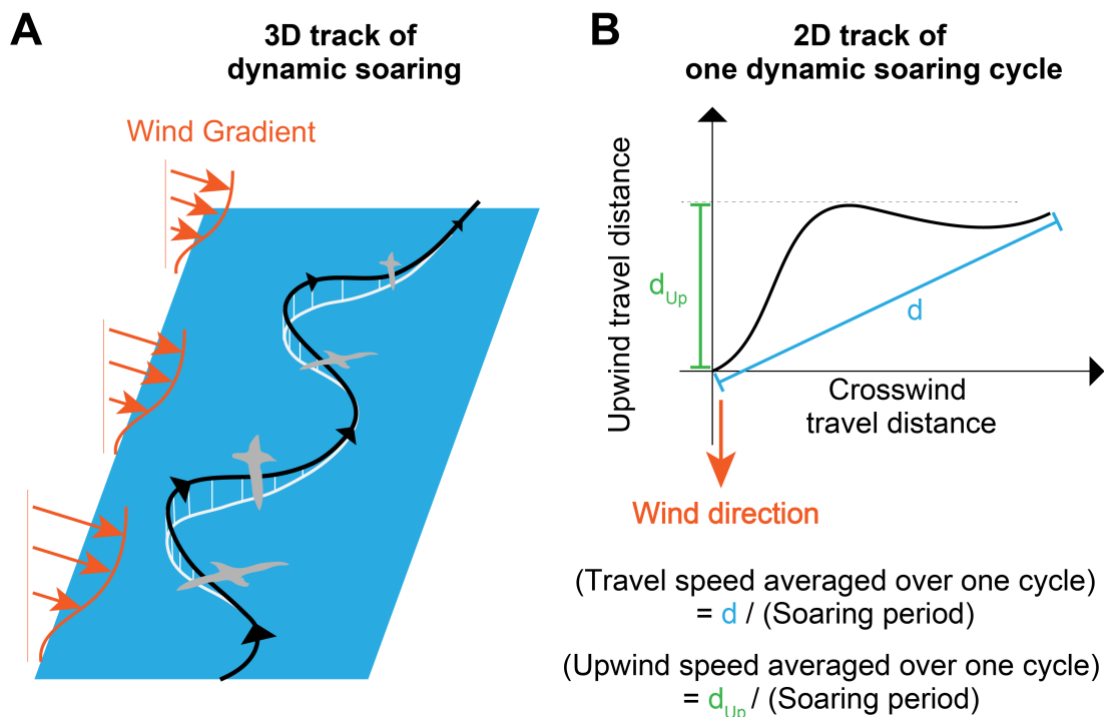

## Thermal soaring

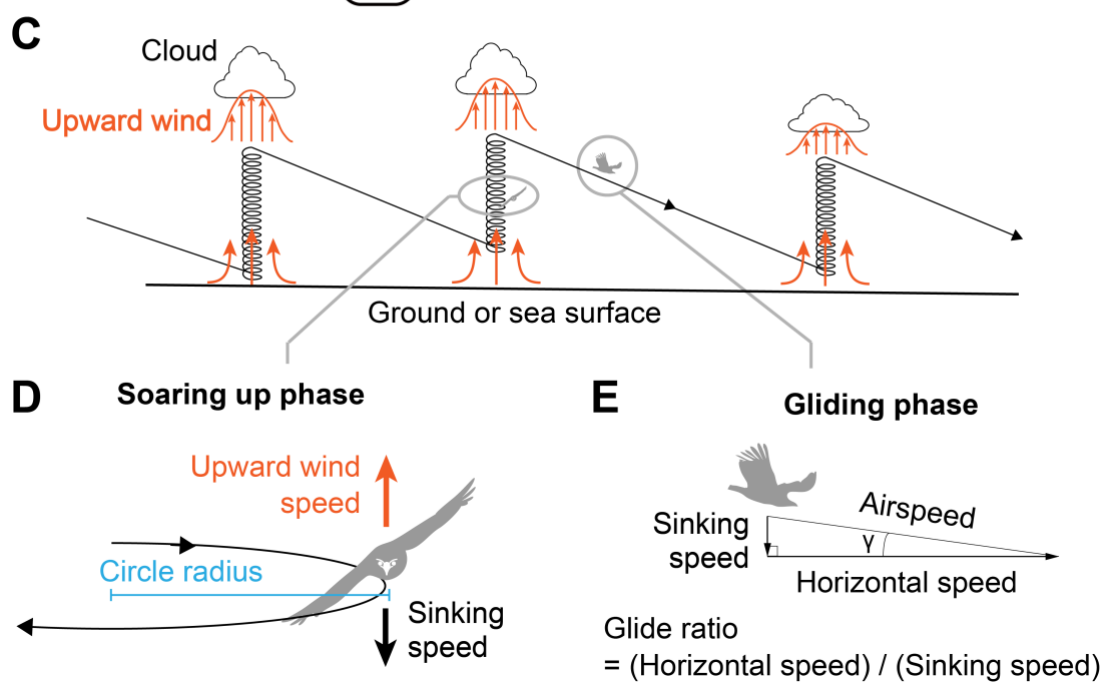

118

119 **Fig. 2.** Schematics of dynamic soaring and thermal soaring. (A) Example of a  
120 3D track of dynamic soaring. Dynamic soaring species repeat an up and down  
121 process with a shallow S-shaped trajectory at the sea surface. By utilizing wind  
122 gradients, a species can fly without flapping. (B) Example of a 2D dynamic  
123 soaring trajectory of one soaring cycle. The travel speed averaged over one  
124 cycle is defined as the travel distance in one cycle ( $d$ ) divided by the soaring  
125 period, and the upwind speed averaged over one cycle is defined as the upwind  
126 travel distance in one cycle ( $d_{up}$ ) divided by the soaring period. (C) Schematic  
127 of a thermal soaring cycle. (D) In the soaring up phase, a species soars in a  
128 steady circle. When there is upward wind that is greater than a species' sinking  
129 speed, the species can ascend in the thermal. The upward wind is stronger in  
130 the center of a thermal; therefore, achieving a small circle radius is  
131 advantageous for thermal soaring. (E) In the gliding phase a species glides in a  
132 straight line. The rate of horizontal speed to the sinking speed is equal to the  
133 rate of horizontal distance traveled to the height lost.

134

135 the thermal. A 'circling envelope' curve visualizes this performance and the required  
136 minimum updraft wind speed. This curve is a graph of the minimum sinking speed (i.e., the required  
137 minimum upward wind speed for ascent) against the radius of turn when a bird glides in a steady circle.  
138 Circling envelopes have been used to quantify the soaring up ability of extant bird species (17, 18).

139 For sustainable dynamic soaring, a certain amount of horizontal wind speed is essential. With  
140 respect to the performance of dynamic soaring, we used two metrics. For soaring animals, traveling fast  
141 enables them to save energy costs. Hence, the first dynamic soaring performance we measured was the  
142 maximum travel speed averaged over one dynamic soaring cycle under a given wind speed (Fig. 2B). In  
143 addition, the ability to travel in a desirable direction irrespective of unfavorable wind conditions is also  
144 necessary. In particular, traveling upwind is the most challenging situation for flying animals.

145 Accordingly, the second performance we measured was the maximum value of the upwind speed, that is,  
146 the parallel component of the travel speed to the upwind direction averaged over one soaring cycle (Fig.  
147 2B). We previously lacked an established framework to quantify the dynamic soaring performances and  
148 minimum required wind speed. In previous studies, the glide polar has been used to quantify the dynamic  
149 soaring ability of animals (1, 15). However, the glide polar assumes that birds glide in a straight line,  
150 which is not the case during the complicated process of dynamic soaring. Hence, the glide polar may be

151 an insufficient metric to describe dynamic soaring performance. A numerical optimization method  
152 developed in the engineering field was recently proposed to quantify the dynamic soaring performance of  
153 birds, requiring wind conditions (19, 20). However, despite its effectiveness, the only animal to which  
154 this technique has been applied is the wandering albatross (19, 20); it has never been applied to extinct  
155 giant flyers.

156           Previous studies reported that *Pelagornis sandersi* was a dynamic soarer, and *Argentavis*  
157 *magnificens*, *Pteranodon*, and *Quetzalcoatlus* were thermal soarers (1, 4, 14, 16) (See **Materials and**  
158 **Methods** “*Quantification of soaring styles in previous studies*” for details about previous studies on this  
159 topic). However, the soaring performances and required wind conditions have not been evaluated  
160 comprehensively for the four giant extinct species summarized in Table 2. Table 2 shows three  
161 knowledge gaps. First, the wind condition and the performance of dynamic soaring have rarely been  
162 evaluated. This is due to the lack of a framework to assess dynamic soaring ability, as mentioned above.  
163 Second, the thermal soaring performance in the soaring up phase and the minimum required updraft wind  
164 speed have not been evaluated for *Pelagornis sandersi*, *Pteranodon*, and *Quetzalcoatlus*. Finally, recent  
165 studies estimated that the body masses of *Pteranodon* and *Quetzalcoatlus* were about three times heavier  
166 than previously expected (5, 10, 21), and the soaring abilities of these new heavy body masses have rarely  
167 been evaluated.

168           In this study, we aimed to address these knowledge gaps surrounding the soaring of these four  
169 extinct giants and, through comparisons with the soaring performance of current birds, we identified the  
170 potential soaring style of extinct giant birds and pterosaurs. First, we quantified the dynamic soaring  
171 performance and required wind speeds using a physical model and a numerical optimization method. This  
172 method has been developed in the engineering field and provides a framework to quantify dynamic  
173 soaring performances and required wind conditions. We applied this framework to the four giant extinct  
174 species and three extant dynamic soaring bird species with various sizes ranging from 1 to 9 kg [i.e., the  
175 white-chinned petrel (*Procellaria aequinoctialis*), the black-browed albatross (*Thalassarche melanophris*),  
176 and the wandering albatross (*Diomedea exulans*)]. As the exact shape of the wind gradient is still poorly  
177 understood, we conducted the calculation under seven different wind conditions (Fig. 3A–C). In addition,  
178 we added an important modification to the previous models: the animal’s wings do not touch the sea  
179 surface during their flight (Fig. 3D; and see Eq. 16 and its description in **Materials and Methods** for  
180 details). Second, we quantified the thermal soaring performances and the required upward wind speeds  
181 for the four extinct species, five extant thermal soaring species [the magnificent frigatebird (*Fregata*  
182 *magnificens*), the black vulture (*Coragyps atratus*), the brown pelican (*Pelecanus occidentalis*), the white  
183 stork (*Ciconia ciconia*), and the California condor (*Gymnogyps californianus*)], and kori bustard



184

| Species                                            | Predicted Soaring Style                                                                               | Dynamic soaring |                 | Thermal soaring       |                       |                           |
|----------------------------------------------------|-------------------------------------------------------------------------------------------------------|-----------------|-----------------|-----------------------|-----------------------|---------------------------|
|                                                    |                                                                                                       | Wind condition  | Performance     | Wind condition        | Performance (Gliding) | Performance (Circling up) |
| <i>Pelagomis sandersi</i>                          | Dynamic soaring (1)                                                                                   |                 | Glide polar (1) |                       | Glide polar (1)       |                           |
| <i>Argentavis magnificens</i>                      | Thermal soaring(4)                                                                                    |                 |                 | Circling envelope (4) | Glide polar (4)       | Circling envelope (4)     |
| <i>Pteranodon</i><br>(Body mass $\cong$ 35kg)      | Thermal soaring (16)<br><br>Dynamic soaring (14)*<br>*based on aspect ratio and relative wing loading |                 |                 |                       | Glide polar (16)      |                           |
| <i>Quetzalcoatlus</i><br>(Body mass $\cong$ 250kg) | Thermal soaring (14)*<br>*based on aspect ratio and relative wing loading                             |                 |                 |                       |                       |                           |

185

186 **Table 2.** Previous studies that quantified the soaring performances and  
 187 required wind conditions of *Pelagornis sandersi*, *Argentavis magnificens*,  
 188 *Pteranodon*, and *Quetzalcoatlus* with recent heavy body mass estimates.

189

190 (*Ardeotis kori*), the heaviest extant volant bird that does not soar. These values were  
 191 calculated using the established framework (i.e., glide polars and circling envelopes). Third, to quantify  
 192 the soaring performances of *Pteranodon* and *Quetzalcoatlus*, we used the recent heavy body mass  
 193 estimates (5). The profile drag coefficients of the pterosaurs ( $C_{Dpro}$ ) were explored for two different cases:  
 194 the same value as for birds ( $C_{Dpro} = 0.014$ ) (17) and a higher value based on reconstructed pterosaur wings  
 195 ( $C_{Dpro} = 0.075$ ) (16, 22).

196

## 197 **Results**

### 198 Dynamic soaring

199 Our computation results indicate that *Argentavis magnificens* and *Quetzalcoatlus* could not have  
 200 employed dynamic soaring (Fig. 4 A–C). Both species showed lower dynamic soaring performances and  
 201 higher required wind speeds for dynamic soaring than the extant dynamic soaring species under all wind  
 202 conditions tested in this study.

203 The dynamic soaring performances and required wind speeds of *Pelagornis sandersi* and  
 204 *Pteranodon* varied substantially with the assumed morphology and shape of the wind gradient, especially  
 205 the height where the steep wind speed change occurs (Fig. 4 A–C).

206

207

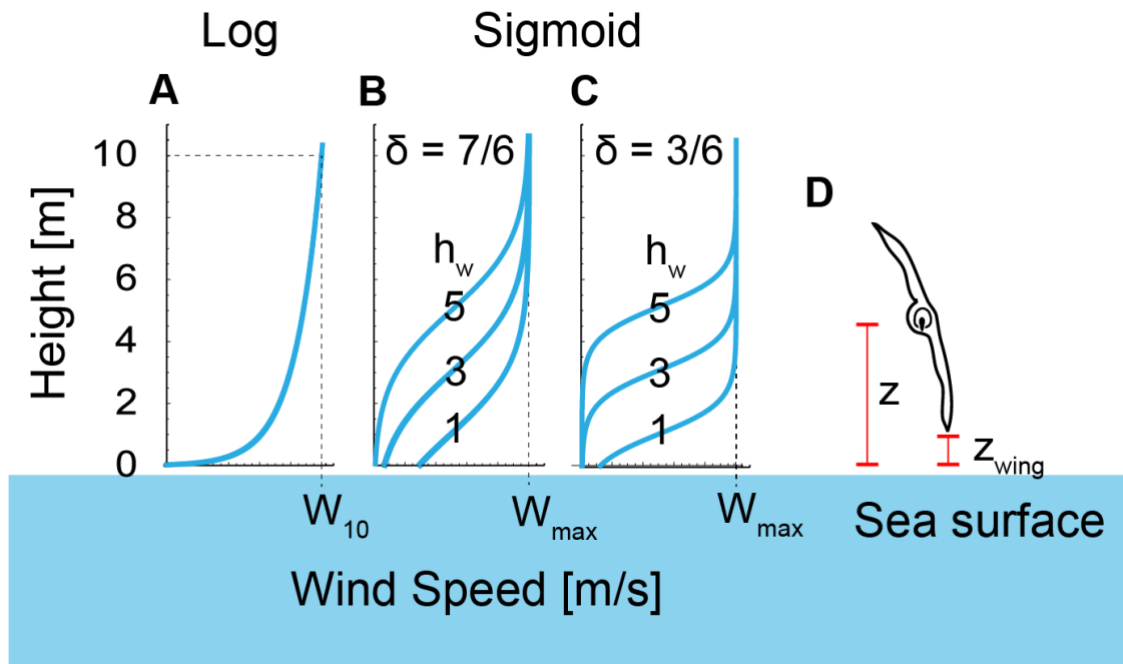

208

209 **Fig. 3.** (A-C) Wind shear models explored in this study. (A) Logarithmic wind  
 210 gradient model. The wind speed at height 10 m was defined as  $W_{10}$ . (B)  
 211 Sigmoidal wind shear model with a wind shear thickness of 7 m ( $\delta = 7/6$ ) and a  
 212 shear height ( $h_w$ ) of 1, 3, or 5 m. (C) Sigmoidal wind shear model with a wind  
 213 shear thickness of 3 m ( $\delta = 3/6$ ) and a shear height of 1, 3, or 5 m. The  
 214 maximum wind speed of the sigmoidal model is represented as  $W_{max}$ . (D)  
 215 Schematic of a soaring bird. Its height from the sea surface is represented as  $z$   
 216 and the height of the wingtip is represented as  $z_{wing}$ . We constrained the models  
 217 so that the wing tip did not touch the sea surface, i.e.,  $z_{wing} \geq 0$ .

218

219 When *Pteranodon* was analyzed with a high-profile drag coefficient it showed poor performance and  
 220 required strong winds compared with extant species, suggesting that *Pteranodon* did not employ dynamic  
 221 soaring. When *Pteranodon* was analyzed with a low-profile drag coefficient value, its performance  
 222 outperformed that of extant birds when the wind change was located high from the sea surface (sigmoidal  
 223 wind condition with  $h_w = 5$  and 3). When the wind speed change was located close to the sea surface  
 224 (logarithmic model and sigmoidal wind condition with  $h_w = 1$ ), *Pteranodon* showed a poor flight  
 225 performance and required a high wind speed. It required a stronger wind speed than the extant dynamic  
 226 soaring species, except for in sigmoidal wind conditions with  $h_w = 5$ . Hence, *Pteranodon* could not  
 227 employ dynamic soaring when a high-profile drag was assumed. Conversely, when a low-profile drag  
 228 was assumed, *Pteranodon* was capable of dynamic soaring but required strong wind conditions.

229

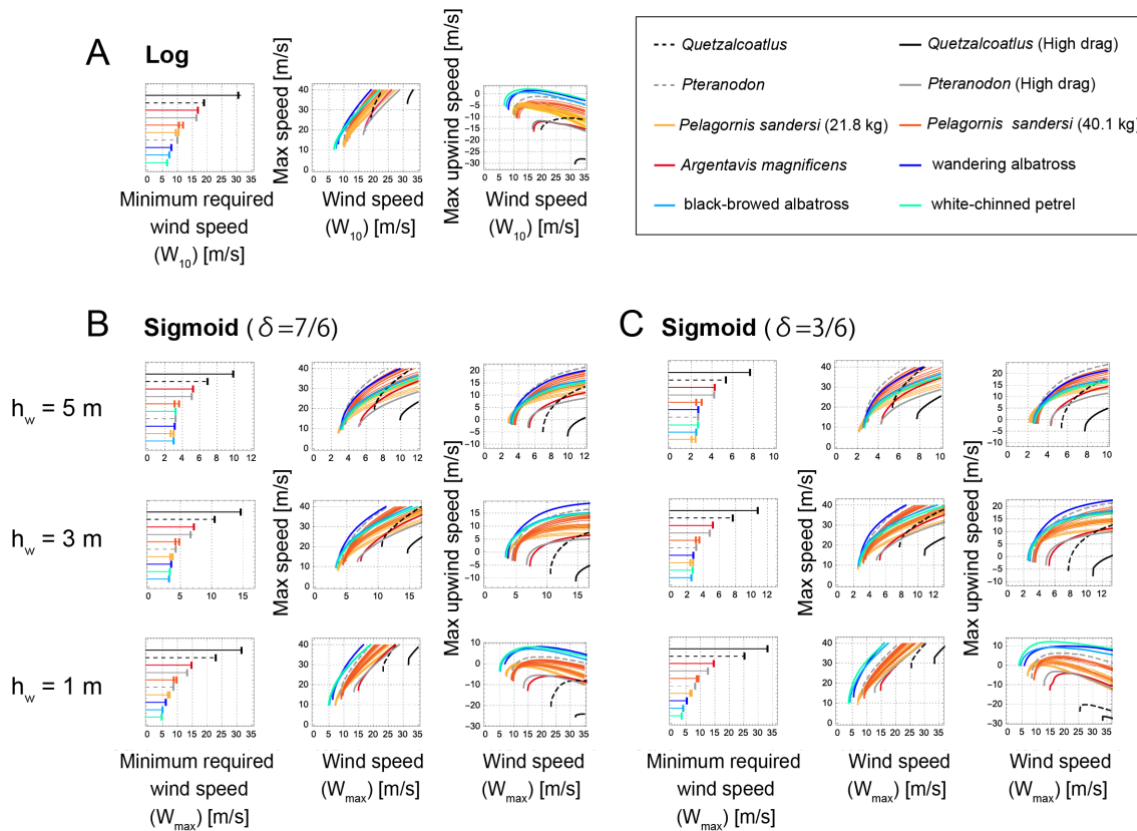

230

231

232 **Fig. 4.** Required minimum wind speeds and dynamic soaring performances of  
 233 extinct and extant animals. (A) Results of the logarithmic wind model. (B)  
 234 Results of the sigmoidal wind model with a wind shear thickness of 7 m ( $\delta =$   
 235  $7/6$ ) and wind shear height ( $h_w$ ) of 1, 3, or 5 m. (C) Results of the Sigmoidal  
 236 wind model with a wind shear thickness of 3 m ( $\delta = 3/6$ ) and a wind shear  
 237 height ( $h_w$ ) of 1, 3, or 5 m. The first column shows the minimum required wind  
 238 speed for sustainable dynamic soaring. The second column shows the  
 239 maximum travel speed averaged over one soaring cycle, in response to wind  
 240 speed. The third column shows the maximum upwind speed averaged over one  
 241 soaring cycle, in response to wind speed.

242

243 For *Pelagornis sandersi*, the results were highly dependent on body mass. With heavy body  
 244 mass estimates (40.1 kg), *Pelagornis sandersi* required higher wind speeds than extant dynamic soaring  
 245 species, irrespective of the wind conditions. The performance was superior to extant species for some  
 246 morphology estimates when the shear height was high from the sea surface (sigmoidal wind condition

247 with  $h_w = 5$  and 3 m), but inferior when the wind speed change was located close to the sea surface  
248 (logarithmic model and sigmoidal wind condition with  $h_w = 1$ ). When lower body mass estimates were  
249 used (21.8 kg), *Pelagornis sandersi* required lower wind speeds, but its performance (maximum speed  
250 and maximum upwind speed) was distinctively lower than that of extant species. Hence, *Pelagornis*  
251 *sandersi* required harsh wind conditions for dynamic soaring when a 40.1 kg body mass was assumed,  
252 and it was poor at dynamic soaring when a 21.8 kg body mass was assumed.

253           The performances of all species varied with the value of  $h_w$ , and the variation was especially  
254 distinct for large species in contrast to that of white-chinned petrels (Fig. 4 B and C). This variation was  
255 due to wingtip boundary conditions (Fig. 3D and Eq. [16]). Animals can attain more energy when passing  
256 through large wind speed gradients, but when large gradient changes are close to sea level, large animals  
257 are unable to use the wind speed gradient efficiently because their wings limit the altitude available to  
258 them. In other words, our results show that it is not enough to discuss the ability of dynamic soaring in  
259 terms of morphology and glide polars alone. Although the long, thin wings that reduce drag in extant  
260 dynamic soaring birds are suited for dynamic soaring (17, 23), detailed dynamic models have shown that  
261 excessively long wings can also inhibit efficient dynamic soaring.

#### 262 Thermal soaring

263 Extinct species showed high gliding performances with maximum glide ratios ranging from 11 to 22 (Fig.  
264 5A), which are comparative to those of extant species (from 11 to 18); nevertheless, *Quetzalcoatlus* had  
265 the lowest soaring efficiency (i.e., 8) among the other species when a high drag coefficient was assumed  
266 ( $C_{Dpro} = 0.075$ ).

267           With respect to the soaring up phase, all of the extinct giant flyers, except for *Quetzalcoatlus*,  
268 had performances equivalent to or better than the extant species (Fig. 5B). As a previous study has  
269 already shown, the circling up performance of *Argentavis magnificens* was comparable to that of the  
270 California condor, one of the largest living thermal soarers (4). The performance of *Pteranodon* was  
271 comparable to that of living thermal soarers, irrespective of the value of the profile drag coefficient ( $C_{Dpro}$   
272 = 0.014 or 0.075). With a higher drag coefficient ( $C_{Dpro} = 0.075$ ), a narrower circling radius was achieved  
273 by *Pteranodon*, and its circling envelope was very similar to that of the black vulture. The thermal  
274 soaring ability of *Pelagornis sandersi* when a light mass was assumed (21.9 kg) was outstanding. It  
275 outperformed many extant thermal soaring species in soaring up ability, and was even comparable to the  
276 magnificent frigatebirds, the champion of thermal soaring among extant species. Even with a heavier  
277 body mass estimate (40.1 kg), *Pelagornis sandersi* still outperformed or was comparable to many other  
278 species.

279

280

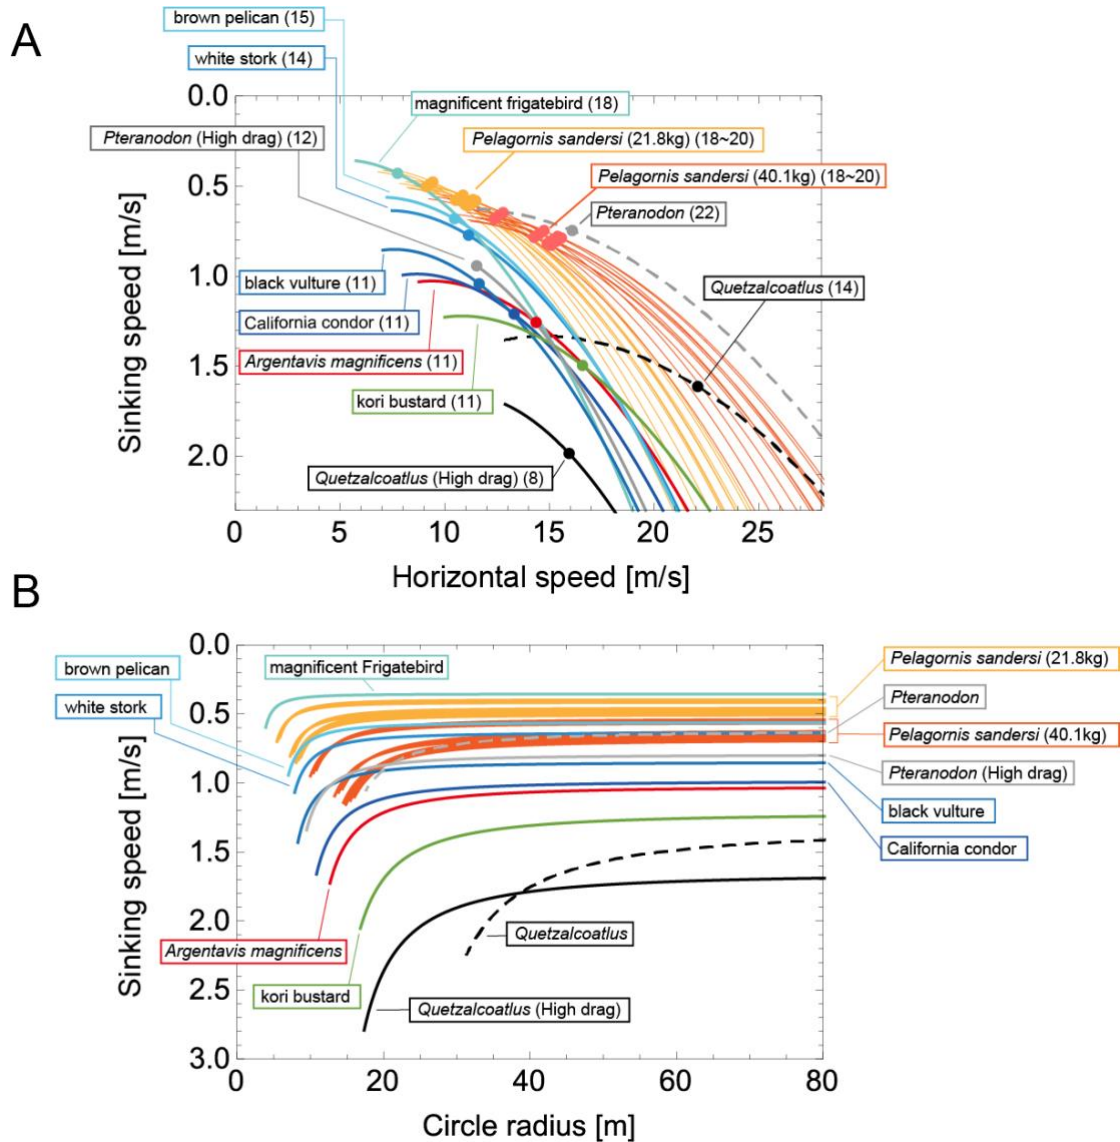

281

282 **Fig. 5.** (A) Glide polars and (B) circling envelopes of extinct species, extant  
 283 thermal soaring species, and the kori bustard, the heaviest rarely flying bird.  
 284 The solid line of *Pteranodon* and *Quetzalcoatlus* represents the result of a low-  
 285 profile drag coefficient ( $CD_{pro} = 0.014$ ), similar to bird species (17), and the  
 286 dashed line represents the result of a high-profile drag coefficient ( $CD_{pro} =$   
 287  $0.075$ ) based on the reconstruction of pterosaur wings (16, 22). In (A), the  
 288 maximum glide ratios of each species are shown on the right side of species  
 289 names. Fig. B shows a circle envelope with a bank angle of up to  $45^\circ$ . The  
 290 turning radius becomes smaller as the bank angle is increased.

291

292 Among the four extinct giant animals investigated in this study, the soaring up performance of  
293 *Quetzalcoatlus* was exceptionally low. It required the strongest upward wind speed and the widest circle  
294 radius. Its performance was even lower than that of the kori bustard, one of the heaviest volant extant  
295 birds that spend most of their time on land and only fly in emergencies, such as when they are under  
296 predation risk.

297

## 298 **Discussion**

299 Using detailed physical models of soaring birds, we computed and compared the dynamic and thermal  
300 soaring performances and the required wind conditions for soaring of four extinct giant flyers with those  
301 of extant dynamic and thermal soaring species. Our results indicate that *Argentavis magnificens* and  
302 *Pteranodon* were thermal soarers, confirming previous studies (4, 16). However, our results also indicate  
303 that *Quetzalcoatlus* could not efficiently perform dynamic nor thermal soaring. In addition, although  
304 *Pelagornis sandersi* was considered a dynamic soaring species in a previous study (1), our results suggest  
305 that it was a thermal soaring bird. In the following, we discuss our results in detail for *Quetzalcoatlus* and  
306 *Pelagornis sandersi* and then describe future issues that need to be addressed for a better understanding of  
307 the soaring styles of extinct giant species.

### 308 *Quetzalcoatlus*

309 There has been a heated debate about the flight capability of *Quetzalcoatlus*. The focal issues have been  
310 whether or not *Quetzalcoatlus* could take off and if it was capable of sustained flapping flight.  
311 Researchers are divided between the opinion that it was too heavy to take off (10, 15, 24) and the opinion  
312 that it was able to take off by using quadrupedal launching, like some bats (11, 14). In addition, detailed  
313 observations of fossils are also presented as evidence that the giant azhdarchids, including  
314 *Quetzalcoatlus*, were capable of flight; for example, a huge deltopectoral crest on their humeri, which  
315 would have anchored muscles for flapping flight (25).

316 While there is some debate as to whether or not giant pterosaurs could have taken off, it has  
317 been widely accepted that if they were able to take off their primary mode of travel would have been  
318 thermal soaring rather than flapping flight. Witton and Habib applied a model of bird flap-gliding flight  
319 (17) to *Quetzalcoatlus*, and they found that this species' flapping flight required anaerobic movement and  
320 was difficult to sustain for long periods of time; therefore, it must have relied on wind energy for long-  
321 distance travel (14). They also concluded that *Quetzalcoatlus* used thermal soaring, based on a  
322 comparison of its morphology with that of birds (5, 14).

323 Our results revealed that *Quetzalcoatlus* had a poor ability to use thermals to ascend. It  
324 required a larger turning radius and stronger updraft than the terrestrial kori bustard, let alone species that

325 use thermal soaring. Whether *Quetzalcoatlus*, with the soaring performance shown in Fig. 5, could  
326 routinely travel long distances by thermal soaring is beyond the scope of this study because of the need to  
327 examine in detail the wind conditions in their habitat at the time they lived. However, the results of this  
328 study alone suggest that *Quetzalcoatlus* performed poorly at thermal soaring compared with modern and  
329 other extinct species, and that the wind conditions under which thermal soaring was possible were  
330 limited. This poor thermal soaring performance was due to the large wing loading associated with the  
331 large body size. As shown in the **Materials and Methods**, the turning radius was proportional to the  
332 wing loading to the power of one half (eq. 19), and the descent speed during the turn was also  
333 proportional to the wing loading to the power of one half, if the effect of the organism's wing length  
334 adjustment was ignored (eqs. 18 and 20, and see also (23)). Since the wing loading is approximately  
335 proportional to body size, a giant *Quetzalcoatlus* required thermals with wider radius and stronger updraft  
336 for thermal soaring.

337           The wing loading also explains why the results of the present study are not consistent with the  
338 claims of previous studies that *Quetzalcoatlus* was adapted to thermal soaring (5, 14). Previous studies  
339 compared aspect ratios and relative wing loadings (wing loading divided by body size) between birds,  
340 bats, and pterosaurs and concluded that *Quetzalcoatlus* was adapted to thermal soaring because it was in  
341 the domain of thermal soaring birds (and, using the same procedure, it was concluded that *Pteranodon*  
342 was adapted to dynamic soaring). Interspecies comparisons of aspect ratios and relative wing loadings  
343 have been made for birds and bats for the purpose of examining the relationship between wing  
344 morphology and ecology (26, 27). However, caution should be taken in evaluating soaring ability with  
345 this size-independent variable (i.e., relative wing loading) because the thermal soaring ability is inevitably  
346 size-dependent, as explained above. When evaluating soaring performance from animal morphology,  
347 using performance and wind requirements calculated from morphology based on the laws of physics (as  
348 conducted in this study and (28)) should be more desirable, as taking an inappropriate morphology as a  
349 variable may lead to erroneous results.

350           Anatomical studies of the azhdarchid pterosaurs have reported that their skeletal structure  
351 shows adaptations to terrestrial walking and suggested that they were terrestrial foragers (29, 30).  
352 Furthermore, a recent phylogenetic analysis showed that the azhdarchoid pterosaurs differed from other  
353 pterosaurs in that they had evolved in a manner that increased the cost of transport for flapping flight and  
354 the sinking speed of gliding (28). Taking into account the adaptations for walking (29, 30), the humeri  
355 feature indicating flapping flight capability (25) but not sustainable flapping flight (14), phylogenetic  
356 tendency of decreasing flight efficiency (28), and the low thermal soaring ability shown here, we suggest  
357 that the flight styles of *Quetzalcoatlus* and other similar-sized azhdarchid species were similar to those of

358 the bustard or hornbill that spend most of their time on land and rarely fly, except in critical emergencies.  
359 Alternatively, they may have routinely flown in early stages of their life history, but as they matured,  
360 wing loading would increase, and they would spend most of their time on land.

361

### 362 *Pelagornis sandersi*

363 Previously, it was reported that *Pelagornis sandersi* was a dynamic soarer like the albatross, rather than a  
364 thermal soarer like frigatebirds (1). However, we argue that this species is highly adapted for thermal  
365 soaring rather than dynamic soaring. The conclusion of the previous study was based on the glide polars  
366 of *Pelagornis sandersi*, which were more similar to those of the wandering albatrosses than those of  
367 frigatebirds; glide performance was the only criterion used to evaluate its soaring style. In this study, we  
368 quantified other performances and the required wind conditions, which enabled us to evaluate the soaring  
369 style of *Pelagornis sandersi* from multiple perspectives.

370 Our results indicated that the dynamic soaring performance of *Pelagornis sandersi* was  
371 generally inferior to that of extant dynamic soaring species, although there were substantial variations  
372 depending on wind conditions and morphology estimates. One of the factors contributing to the poor  
373 dynamic soaring ability of this species was an inability to efficiently exploit the wind speed gradient due  
374 to long wings limiting the height above sea level at which the bird could fly. Note that this effect could  
375 not be assessed by the glide polars.

376 Conversely, the thermal soaring ability of *Pelagornis sandersi* was outstanding regardless of  
377 the morphology estimates used. It could circle in narrow thermals with a low sinking speed, as in extant  
378 species. Its performance to soar up thermals was even comparable to that of the frigatebird, the champion  
379 of extant thermal soaring species. As mentioned earlier, the ability of thermal soaring is largely dependent  
380 on the animal's wing loading. The reason why *Pelagornis sandersi* showed such a high performance is  
381 because of its low wing loading in spite of its huge size. In addition, its glide ratio was also high,  
382 outperforming most of the extant thermal soaring species. Accordingly, *Pelagornis sandersi* showed high  
383 performances both in the ascent and gliding phase of thermal soaring, indicating that this species was  
384 highly adapted to thermal soaring. Considering that *Pelagornis sandersi* was found close to the coast, this  
385 result indicates that *Pelagornis sandersi* was well adapted to capture a weak updraft above the sea and  
386 could stay aloft for a long time with limited flapping and traveled long distances like frigatebirds.

387

### 388 Future issues

389 In this section, we discuss some of the simplifications used in this study and issues that we believe need  
390 to be examined in the future. The first issue is flight stability. In this study, a steady wind environment



391 was assumed, but actual wind environments fluctuate. In such a fluctuating real-world environment,  
392 stability is an important factor that determines the success or failure of flight (31, 32). To simplify our  
393 calculations, we did not address stability, but it is important to examine the flight stability of these extinct  
394 and extant birds using more detailed morphological information in the future.

395           The next issue is that the actual wind environment experienced by animals is still largely  
396 unknown. For dynamic soaring, the specific form of the wind speed gradient experienced by birds is  
397 unknown—for example, whether there is a logarithmic or sigmoidal gust in the shadows of the waves—  
398 and information on the height and thickness of the wind speed gradient is not yet known. For this reason,  
399 we evaluated performance under various wind conditions (Fig. 3). For thermal soaring, it is also unknown  
400 how much updraft animals experience at a given turning radius or the distance between thermals. Recent  
401 advances in tracking technology have made it possible to record details of the motion of birds in dynamic  
402 and thermal soaring (33–37). We believe that these data will provide information that will help us to  
403 understand our results and improve our model, such as the real wind environment experienced by animals  
404 (37–41). In addition, it is also important to consider the paleoenvironmental aspects of the wind  
405 environment at the time of the extinct species' inhabitation. For example, we have shown that  
406 *Quetzalcoatlus* had a lower thermal soaring capacity than the extinct species. Paleoclimatic estimates may  
407 help us to understand whether the species had a favorable wind environment that allowed it to use thermal  
408 soaring as its primary mode of transport, even with their poor soaring up ability.

409           Finally, we would like to emphasize the importance of a comprehensive assessment of  
410 soaring performance and wind requirements of each soaring style, as we have done in this study.  
411 Although a great deal of previous research has been done on the soaring performance of extinct species,  
412 there have been several evaluation gaps. Our approach filled these gaps and allowed us to examine the  
413 soaring style of extinct giants from multiple perspectives, reaching different conclusions about the soaring  
414 styles of *Quetzalcoatlus* and *Pelagornis sandersi*. Future analyses that account for the above issues and/or  
415 updated morphological estimates will be necessary to more accurately estimate the soaring ability of  
416 extinct giants and thus their paleoecology, which may lead to different conclusions than those of this  
417 study. However, the importance of the framework presented here for a comprehensive assessment of  
418 soaring flight performance and wind requirements remains unchanged. We hope that this study will serve  
419 as a springboard for future discussions of soaring capabilities of extinct species.

420

421 **Materials and Methods**

422

### 423 **Quantification of soaring styles in previous studies**

424 This section reviews previous studies on the soaring performance of extinct giant animals. In particular,  
425 we focus on which indices have been quantitatively evaluated for each species.

426

#### 427 *Pelagornis sandersi*

428 *Pelagornis sandersi* is predicted to be a dynamic soarer rather than a thermal soarer as its glide polar (and  
429 glide ratio that can be derived from its glide polar) is more similar to those of living dynamic soarers than  
430 those of living thermal soarers (1). However, this means our understanding of this species' soaring style  
431 has been based on just one metric, that is, its glide ratio (Table 2). Hence, evaluating the other metrics of  
432 this species is important for a more accurate estimate of the soaring style of this species. A previous study  
433 cautiously calculated *Pelagornis sandersi*'s glide polars for 24 combinations of estimates (body mass =  
434 21.8 and 40.1 kg, wingspan = 6.06, 6.13, 6.40, and 7.38, and aspect ratio = 13,14, and 15) to deal with  
435 morphological uncertainty. Hence, we also employed these estimates in this study.

436

#### 437 *Argentavis magnificens*

438 *Argentavis magnificens* is expected to be a thermal soarer. A previous study reported that the thermal  
439 soaring performance and required wind conditions of this species are comparable to living thermal  
440 soaring species based on glide polars and circling envelopes (4). This result is consistent with the fact that  
441 an *Argentavis* specimen was found on the foothills and pampas of Argentina, far from coastlines (4).

442

#### 443 *Pteranodon* and *Quetzalcoatlus*

444 Although assessments of the soaring abilities of *Pteranodon* and *Quetzalcoatlus* have been a long-  
445 standing issue, we still lack a comprehensive understanding of their soaring style due to many  
446 uncertainties in the estimates of their morphology, especially because of the significant changes in weight  
447 estimates around 2010. Previously, it was estimated that *Pteranodon* had a wingspan of around 7 m and a  
448 body mass of 16 kg, while *Quetzalcoatlus* had a wingspan of around 11 m and a body mass of 50–70 kg.  
449 Based on these estimates, previous studies argued that they were adapted to thermal soaring (42, 43) and  
450 others argued that they could also employ dynamic soaring (15). Around 2010, however, many studies  
451 with different approaches suggested that pterosaurs were much heavier than previously expected (5, 10,  
452 21). For example, Witton estimated that *Pteranodon* was 36 kg with a 5 m wingspan, and *Quetzalcoatlus*  
453 was 259 kg with a 10 m wingspan (5). Other studies also reported similar estimated values (10, 21). Few  
454 studies have quantified the soaring performance of these species based on these new heavy body mass

455 estimates. For example, Witton and Habib argued that *Pteranodon* was a dynamic soarer and  
456 *Quetzalcoatlus* was a thermal soarer by comparing the aspect ratios and the relative wing loadings of  
457 these species with those of extant soaring bird species (5, 14). Conversely, a recent study quantified the  
458 cost of transport and sinking speeds during gliding in 128 pterosaur species and showed that azhdarchoid  
459 pterosaurs, including *Quetzalcoatlus*, had lower flight efficiency than the other pterosaurs (28). However,  
460 despite these studies, we still have not been able to comprehensively quantify the performance and wind  
461 requirements of dynamic and thermal soaring in these species. Furthermore, pterosaurs have a wing  
462 morphology that is completely different from that of birds and bats. Some studies reported that the wings  
463 of pterosaurs would have been associated with high-profile drag (drag stemming from the wings) (16,  
464 22). Palmer experimentally measured profile drag in a wind tunnel experiment using reconstructed  
465 pterosaurs wings (16). With the experimentally derived profile drag, *Pteranodon*'s glide polars with the  
466 heavy body mass estimates were determined. Palmer concluded that *Pteranodon* adopted thermal soaring  
467 with a slow flight speed.

468

## 469 **Models**

470 The dynamics of soaring animals are described using the equations of motion (EOM). We first describe  
471 the EOM and parameters therein. Using the EOM, we can calculate soaring performances and the wind  
472 speeds required for sustainable soaring. We then describe the calculation procedure for dynamic soaring  
473 and thermal soaring, respectively.

474

### 475 Aerodynamic forces and parameters

476 We regard an animal as a point of mass. The dynamics of the animal's three-dimensional position  $\mathbf{X}(t)$   
477 and velocity  $\mathbf{V}(t)$  are represented by the following EOMs:

478

$$479 \quad m \frac{d\mathbf{V}(t)}{dt} = \mathbf{L} + \mathbf{D} + m\mathbf{g} \quad [1]$$

$$480 \quad m \frac{d\mathbf{X}(t)}{dt} = \mathbf{V}(t) \quad [2].$$

481

482 When an animal is soaring, three forces—gravitation ( $m\mathbf{g}$ ), lift force ( $\mathbf{L}$ ), and drag force ( $\mathbf{D}$ )—act on it.  
483 Gravitation  $m\mathbf{g}$  is a product of the constant of gravitation ( $\mathbf{g}$ ) and mass of the bird ( $m$  kg), and its direction  
484 is towards the ground. The direction of the lift force  $\mathbf{L}$  is dorsal and perpendicular to the air velocity. Drag  
485 force  $\mathbf{D}$  is against the air velocity. For the analysis of dynamic soaring, we assumed that wind blow is

486 along the y-axis and represent these EOMs in a different way by transforming the ground velocity to pitch  
 487  $\gamma$ , yaw  $\psi$ , bank angle  $\phi$ , and airspeed  $V$  using the following equations (20):

488

$$489 \quad m \frac{dV}{dt} = -D - mg \sin \gamma + m \frac{\partial W(z)}{\partial z} \frac{dz}{dt} \cos \gamma \sin \psi \quad [3],$$

$$490 \quad mV \frac{d\gamma}{dt} = L \cos \phi - mg \cos \gamma - m \frac{\partial W(z)}{\partial z} \frac{dz}{dt} \sin \gamma \sin \psi \quad [4],$$

$$491 \quad mV \cos \gamma \frac{d\psi}{dt} = L \sin \phi + m \frac{\partial W(z)}{\partial z} \frac{dz}{dt} \cos \psi \quad [5],$$

492

$$493 \quad \frac{dx}{dt} = V \cos \gamma \cos \psi \quad [6],$$

$$494 \quad \frac{dy}{dt} = V \cos \gamma \sin \psi - W(z) \quad [7],$$

495 and

$$496 \quad \frac{dz}{dt} = V \sin \gamma \quad [8],$$

497

498 where  $W(z)$  represents the wind gradient. A specific form is given in the latter subsection.  $L$  represents the  
 499 strength of the lift force, and  $D$  represents that of the drag force. The aerodynamic theory asserts that  
 500 these values are

501

$$502 \quad L = |\mathbf{L}| = \frac{1}{2} \rho C_L S_W V^2 \quad [9]$$

503 and

$$504 \quad D = |\mathbf{D}| = \frac{1}{2} \rho C_{D\text{pro}} S_W V^2 + \frac{1}{2} \rho C_{D\text{par}} S_B V^2 + \frac{\rho (k C_L^2)}{2\pi R_a} S_W V^2 \quad [10].$$

505

506 Here,  $\rho$  is air density and was set to  $\rho = 1.23 \text{ kg m}^{-3}$  (28). This is the International Standard Atmosphere  
 507 values for sea level at 15 °C expressed as 3 significant digits (1).  $C_L$  represents the lift coefficient.  $S_W$   
 508 represents the wing area. The drag is composed of three terms. The first term is the profile drag that stems  
 509 from friction on the body.  $C_{D\text{pro}}$  is the profile drag coefficient. For birds, a  $C_{D\text{pro}}$  of 0.014 was employed  
 510 following previous studies (1, 17). However, based on the reconstruction of pterosaur wings and a wind  
 511 tunnel experiment, some studies have argued that the pterosaur profile drag coefficient is much higher  
 512 (approximately 0.05–0.1) (16, 22). Hence, for the profile drag of *Pteranodon* and *Quetzalcoatlus*, we

513 explored two cases: a bird-like low-profile drag of 0.014 and an experimentally based high-profile drag of  
514 0.075 (we note that, although the experiments in the previous study assumed a pterosaur with a wing span  
515 of approximately 6 m (16), we assumed that the result would not vary significantly with the size of  
516 *Quetzalcoatlus*). The second term is the parasite drag stemming from friction on the wing, where the  $C_{Dpar}$   
517 is the parasite drag coefficient, and  $S_B$  is the body frontal area. We used the following recently  
518 recommended formula

$$519 \quad C_{Dpar}S_B = 0.01S_W \quad [11]$$

520  
521 on the practical basis that neither  $C_{Dpar}$  nor  $S_B$  is exactly known (23). The third term is the induced drag  
522 that stems from the lift force.  $R_a$  represents the aspect ratio ( $R_a = b^2 / S_W$ , where  $b$  is the wingspan).  $k$  is  
523 the induced drag factor; we set  $k$  to 1.1, as in previous studies (1, 14, 17). The lift coefficient has a  
524 maximum value; for birds, we set  $C_L$  to  $\leq 1.8$  (17). As the aerodynamic properties of pterosaurs can  
525 differ from those of birds, and the wind tunnel experiment indicated that  $C_L$  reached more than 2.0 (16),  
526 we set the pterosaurs' lift coefficient to  $\leq 2.2$ .

527 The remaining parameters in the EOMs are body mass ( $m$ ), wingspan ( $b$ ), and wing area ( $S_w$ ).  
528 For these morphological parameters of extant birds, we used values reported in previous studies. For  
529 *Pelagornis sandersi*, we used 24 combinations of estimates proposed in a previous study (1). For  
530 *Argentavis magnificens*, we used the estimates in (4). For *Pteranodon* and *Quetzalcoatlus*, we used the  
531 recent estimates for heavy pterosaurs, as reported in (5). These values are shown in Table 1.

532 The EOMs include variables that soaring animals can control, that is, bank angle  $\phi(t)$  and lift  
533 coefficient  $C_L$ . Although these variables are time-dependent, for simplicity, we assumed that the animals  
534 keep their lift coefficients at a constant value. Hence, using a time series for bank angle, a constant value  
535 of  $C_L$ , and values of parameters, the dynamics of the soaring animals were determined with EOM.

536

### 537 Quantification of the dynamic soaring performance and the required minimum wind speed

538

#### 539 **Wind gradient model**

540 We explored two types of wind gradients. The first was the logarithmic model represented as

541

542 [Logarithmic wind gradient model]

$$543 \quad W_{Log}(z) = W_{10} \log \left[ \frac{z/h_{min}}{10/h_{min}} \right] \quad [12].$$

544

545 This function is defined at  $z > h_{\min}$ . We set  $h_{\min}$  to 0.03 [m], following a previous study (19).  $W_{10}$  is the  
546 wind speed at height  $z = 10$  m. This model is deemed to be a good model of the average wind field in the  
547 first 20 m above the sea surface, assuming a flat sea surface, and has been a popular approach in dynamic  
548 soaring modeling. However, recent studies have argued that the real sea surface is not flat, and wind  
549 separations in ocean waves may occur more often than expected (44). To describe wind-separation-like  
550 wind profiles, a sigmoidal model has been proposed (20, 45). We also employed the sigmoidal wind  
551 model with a minor change, represented as

552

553 [Sigmoidal wind gradient model]

554 
$$W_{\text{Sigmoid}}(z) = \frac{W_{\max}}{1 + e^{-\frac{z-h_w}{\delta}}} \quad [13].$$

555  $h_w$  determines the height of wind separation, as shown in Fig. 3. In this study, we set  $h_w$  to 1, 3, and 5.  $\delta$  is  
556 the thickness parameter. The wind speed changes with height ( $|z - h_w| \lesssim 3\delta$  m). In a previous study,  
557 the wind shear thickness was speculated as approximately 1.5–7 m. Here, we set  $\delta$  to 3/6 with a steep  
558 wind change, and 7/6 with a gentler change (Fig. 3).

559

## 560 Formulation to numerical optimization

561 The numerical computation of dynamic soaring performance and minimum wind speed boiled down to  
562 the restricted optimization problem. That is, a mathematical problem to find the values of ( i ) a certain  
563 variable  $\mathbf{Y}$  that maximizes ( ii ) an objective function  $f(\mathbf{Y})$ , satisfying ( iii ) equalities  $\mathbf{h}(\mathbf{Y}) = 0$  and ( iv )  
564 inequalities  $\mathbf{g}(\mathbf{Y}) \leq 0$ . In the following, we describe the variables, object functions, equalities, and  
565 inequalities for dynamic soaring.

566

567 ( i ) Variables

568 The dynamics of dynamic soaring animals are described by the 3D position  $(x(t), y(t), z(t))$ , pitch  
569 angle  $\gamma(t)$ , yaw angle  $\psi(t)$ , airspeed  $V(t)$ , bank angle  $\phi(t)$ , lift coefficient  $C_L$ , and the period of one  
570 dynamic soaring cycle  $\tau$ . Among these variables, 3D position, pitch, yaw, bank, and airspeed are  
571 functions of time  $t$  ( $0 \leq t \leq \tau$ ). Optimization problems that include functions as variables are difficult to  
572 be directly solved. Therefore, we employed a collocation approach (20, 46). The collocation approach  
573 discretizes the variables in time, such as  $X(t)$  ( $0 \leq t \leq \tau$ ) to variables  $X_i = X((i-1)N/\tau)$  ( $i = 1, N$ ), and  
574 converts the EOM to the equalities between those discretized variables. Hereafter, we use  $X_{1:N} = \{X_1,$   
575  $X_2, \dots, X_N\}$ . In this study, we set the number of discretization points to  $N = 51$  in order to perform  
576 computations with reasonable accuracy within a reasonable amount of time. Accordingly, the variables of

577 this optimization problem are position  $x_{1:N}, y_{1:N}, z_{1:N}$ , pitch angle  $\gamma_{1:N}$ , yaw angle  $\psi_{1:N}$ , airspeed  $V_{1:N}$ ,  
578 bank angle  $\phi_{1:N}$ , lift coefficient  $C_L$ , and a period of one soaring cycle  $\tau$ . In addition, when computing the  
579 minimum wind speed required for sustainable dynamic soaring,  $W_{10}$  (log model) or  $W_{\max}$  (sigmoid model)  
580 were also treated as variables. Hence, the total number of variables were  $7 \times 51 + 2 (+1) = 359$  (or 360).

581

582 (ii) Object function

583 First, we computed (1) the minimum wind speed required for sustainable dynamic soaring for each wind  
584 gradient model. As the objective function to minimize, we set  $W_{10}$  for the logarithmic model and  $W_{\max}$  for  
585 the sigmoidal model. Then, we computed (2) the maximum speed averaged over one dynamic soaring  
586 cycle by maximizing the object function to  $\sqrt{x_N^2 + y_N^2}/\tau$ . Finally, we computed (3) the maximum upwind  
587 speed averaged over one dynamic soaring cycle by maximizing the object function  $y_N/\tau$ . With respect to  
588 the maximum speed and maximum windward speed, we computed these values for different wind speeds,  
589 that is, from the minimum required wind speed of the species to the highest minimum required wind  
590 speed among the examined species (i.e., *Quetzalcoatlus*) +2 m/s. In this wind speed range, the maximum  
591 speed reached an unrealistically high value and/or the optimization calculation did not converge for some  
592 species. Thus, we stopped the computation of the maximum speed at the wind speed where the maximum  
593 speed exceeded 40 m/s (144 km/h).

594

595 (iii) Equalities

596 The first equalities to be fulfilled for dynamic soaring animals are given in Eq. 3–8. The collocation  
597 approach converts the EOM into the equalities between the variables listed in the above section. As the  
598 number of original EOM was six and the number of discretization was 51, the EOM were converted into  
599  $6 \times 51 = 306$  equalities (see (20, 46) for the specific representations of these equalities).

600 The second type of equalities to be fulfilled were periodic boundary conditions of dynamic  
601 soaring: at the beginning and end of one dynamic soaring cycle, the state of the animal (i.e., pitch, yaw,  
602 airspeed, bank, height) is the same, represented as

603

$$604 \quad z_1 = z_N, \gamma_1 = \gamma_N, \psi_1 = \psi_N, \phi_1 = \phi_N, V_1 = V_N \quad [14].$$

605

606 (iv) Inequalities

607 First, we assumed that there was a maximum limit of physical load on the animal. This is because  
608 dynamic soaring entails dynamic maneuvering, which results in a corresponding acceleration. We  
609 employed the approach of a previous study (19) that restricted the load factor ( $L/mg$ ) to less than 3,

610

611 
$$\frac{L}{mg} \leq 3 \quad [15].$$

612

613 The second inequality was an important modification of the previous models. The height of  
614 the animal's wingtip ( $z_{\text{wing}}$ ) was calculated as above the sea surface and was represented as

615

616 
$$z_{\text{wing}} = z - \frac{b}{2} \sin \phi \cos \gamma \geq 0 \quad [16].$$

617 Previous studies discarded the existence of the sea surface (20) or restricted birds to only flying higher  
618 than a given height (1.5 m) from the sea surface (19). However, the height a bird can fly depends on the  
619 wing length and the bank angle (e.g., with a shorter wing length and a lower bank angle, a bird can fly at  
620 a lower height). When dynamic soaring birds fly, they adjust their wingtips close to, but avoid touching,  
621 the sea surface (Fig. 3D). Dynamic soaring birds can exploit more flight energy when they pass through  
622 stronger wind speed differences. As the wind speed difference is strong close to the sea surface, how  
623 close to the sea surface a bird can fly is crucial for dynamic soaring birds. Accordingly, long wings may  
624 restrict the minimum height at which the bird can fly and disturb efficient dynamic soaring. Hence,  
625 considering the effect of wings is crucial for evaluating dynamic soaring performances.

626 Third, we also assumed that the height of the animal was higher than 0.5 m, that is,

627

628 
$$z \geq 0.5 \quad [17].$$

629

630 The optimization problem described here is a restricted non-linear optimization problem. We used the  
631 SQP method to solve the problem with the “fmincon” function in MATLAB® Ver R2019a.

632

### 633 Quantification of the thermal soaring performance and the required minimum upward wind speed

634 For the computation of glide polars and circling envelopes, we followed the same procedure as the *Flight*  
635 software developed for evaluating bird flight performance, as described in (17). In the following, we  
636 outline the procedure and parameters employed in this study.

637 First, before computing the glide polars, we determined how gliding animals adjust their  
638 wingspan with respect to their airspeed. Three wingspan reduction ways (linear wingspan reduction,  
639 wing-drag minimizing wingspan reduction, and fixed wingspan) are presented in (17). We have  
640 calculated for all the reduction ways and found no substantial difference in the results (see Fig.5 and SI



641 Appendix). In main text, we show the results of the *Flight*'s default setting used in previous studies (1,  
 642 14), which assumes that wingspan, wing area, and thus aspect ratio linearly decrease with factor  $\beta = (B_{\text{stop}}$   
 643  $- V/V_S) / (B_{\text{stop}} - 1)$ ; i.e., we replaced  $b$ ,  $S_W$ , and  $R_a$  with  $\beta b$ ,  $\beta S_W$ , and  $\beta R_a$ , respectively. In this equation,  $V_S$   
 644 is the stall speed, the airspeed of the animal at the highest lift coefficient (i.e.,  $V_S =$   
 645  $\sqrt{(2mg)/(\rho S_W C_{L\text{max}})}$ ); and  $B_{\text{stop}}$  is a constant that determines the degree of wing reduction. For birds, we  
 646 set  $B_{\text{stop}}$  to 5, the default value in *Flight*. For pterosaurs, we set  $B_{\text{stop}}$  to 6, following a previous study (14).  
 647 Then, the glide polars were derived from the EOM, setting bank angle to 0, assuming that the pitch angle  
 648 was small enough ( $\gamma \ll 1$ ) and considering the gliding animal was at kinematical equilibrium ( $mg =$   
 649  $\sqrt{L^2 + D^2} \simeq L$ ,  $\sin \gamma = D/L \simeq L/mg$ ). Sinking speed was represented as a function of airspeed  $V$  (17),  
 650

$$651 \quad V_{\text{Sink}} = \frac{\rho}{2} \left( \frac{S_W}{mg} \right) (C_{D\text{pro}} \beta + 0.01) V^3 + \left( \frac{mg}{S_W} \right) \left( \frac{2k}{\rho R_a \beta^2 \pi} \right) \frac{1}{V} \quad [18].$$

652  
 653 This relation gives a glide polar. Note that we used eq. 11 ( $C_{D\text{par}} S_B = 0.01 S_W$ ; in this equation,  $S_W$  was not  
 654 replaced with  $\beta S_W$ ) to derive the above equation. The horizontal speed is  $\sqrt{V^2 - V_{\text{Sink}}^2}$ . Thus, the

655 maximum glide ratio is the maximum value of  $\sqrt{V^2 - V_{\text{Sink}}^2} / V_{\text{Sink}}$ .

656 The circling envelope is given with the radius of the circle ( $r$ ), and the sinking speed in a circling glide  
 657 ( $V_{\text{Sink,Circle}}$ ) is represented by the bank angle ( $\phi$ ),

$$658 \quad r = \frac{2m}{C_L^* S_W \rho \sin \phi} \quad [19]$$

659 and

$$660 \quad V_{\text{Sink,Circle}} = \frac{V_{\text{Sink,min}}}{(\cos \phi)^{3/2}} \quad [20],$$

661 where  $C_L^*$  and  $V_{\text{Sink,min}}$  are the lift coefficient and the sinking speed at the minimum sinking speed of  
 662 the glide polar, respectively (17). The minimum circle radius is given when  $\phi = 90^\circ$ . Minimum circle  
 663 radius, minimum sinking speed, maximum glide ratio, and horizontal speed are shown in SI Appendix,  
 664 Table S1, S2, and S3 for three wing reduction ways.

665

666

667 **Acknowledgments:** The authors thank Chihiro Kinoshita for illustrating Fig. 1. We thank Fujiwara Shin-  
 668 ichi for reading the draft of this paper and for providing valuable comments. This study was financially

669 supported by Grants-in-Aid for Scientific Research from the Japan Society for the Promotion of Science  
670 (16H06541, 16H01769), and JST CREST Grant Number JPMJCR1685, Japan.

671

672 **Author contributions:** YG, KY, HW, and KS designed the study; YG conducted the computation; all  
673 authors participated in the writing of the manuscript (YG wrote the first draft).

674

675 **Competing interests:** The authors declare that they have no competing interests.

676

677

678

## 679 References

- 680 1. Ksepka DT (2014) Flight performance of the largest volant bird. *Proc Natl*  
681 *Acad Sci* 111(29):10624–10629.
- 682 2. Campbell Jr KE, Tonni EP (1981) Preliminary observations on the paleobiology  
683 and evolution of teratorns (Aves: Teratornithidae). *J Vertebr Paleontol* 1(3–  
684 4):265–272.
- 685 3. Campbell Jr KE, Tonni EP (1983) Size and locomotion in teratorns (Aves:  
686 Teratornithidae). *Auk* 100(2):390–403.
- 687 4. Chatterjee S, Templin RJ, Campbell Jr KE (2007) The aerodynamics of  
688 Argentavis, the world's largest flying bird from the Miocene of Argentina. *Proc*  
689 *Natl Acad Sci* 104(30):12398–12403.
- 690 5. Witton MP (2008) A new approach to determining pterosaur body mass and its  
691 implications for pterosaur flight. *Zitteliana* B28:143–158.
- 692 6. Frey E, Martill DM (1996) A reappraisal of Arambourgiania (Pterosauria,  
693 Pterodactyloidea): one of the world's largest flying animals. *Neues Jahrb für*  
694 *Geol und Paläontologie–Abhandlungen* 199:221–247.
- 695 7. Buffetaut E, Grigorescu D, Csiki Z (2003) Giant azhdarchid pterosaurs from  
696 the terminal Cretaceous of Transylvania (western Romania). *Geol Soc London,*  
697 *Spec Publ* 217(1):91–104.
- 698 8. Hone DWE, Habib MB, Therrien F (2019) Cryodrakon boreas, gen. et sp. nov., a  
699 Late Cretaceous Canadian Azhdarchid Pterosaur. *J Vertebr Paleontol*  
700 39(3):e1649681.
- 701 9. Vremir M, Dyke G, Csiki-Sava Z, Grigorescu D, Buffetaut E (2018) Partial  
702 mandible of a giant pterosaur from the uppermost Cretaceous (Maastrichtian)  
703 of the Hațeg Basin, Romania. *Lethaia* 51(4):493–503.
- 704 10. Sato K, et al. (2009) Scaling of soaring seabirds and implications for flight  
705 abilities of giant pterosaurs. *PLoS One* 4(4):e5400.
- 706 11. Habib MB (2008) Comparative evidence for quadrupedal launch in pterosaurs.  
707 *Zitteliana* B28:159–166.
- 708 12. Cannell AER (2020) Too big to fly? An engineering evaluation of the fossil  
709 biology of the giant birds of the Miocene in relation to their flight limitations,  
710 constraining the minimum air pressure at about 1.3 bar. *Anim Biol* 70(3):1–20.

- 711 13. Williams HJ, et al. (2020) Physical limits of flight performance in the heaviest  
712 soaring bird. *Proc Natl Acad Sci* 117(30):17884–17890.
- 713 14. Witton MP, Habib MB (2010) On the size and flight diversity of giant  
714 pterosaurs, the use of birds as pterosaur analogues and comments on  
715 pterosaur flightlessness. *PLoS One* 5(11):e13982.
- 716 15. Chatterjee S, Templin RJ (2004) *Posture, locomotion, and paleoecology of*  
717 *pterosaurs* (Geological Society of America).
- 718 16. Palmer C (2011) Flight in slow motion: aerodynamics of the pterosaur wing.  
719 *Proc R Soc B Biol Sci* 278(1713):1881–1885.
- 720 17. Pennycuik CJ (2008) *Modelling the flying bird* (Elsevier).
- 721 18. Pennycuik CJ (1983) Thermal soaring compared in three dissimilar tropical  
722 bird species, *Fregata magnificens*, *Pelecanus occidentalis* and *Coragyps*  
723 *atratus*. *J Exp Biol* 102(1):307–325.
- 724 19. Sachs G (2005) Minimum shear wind strength required for dynamic soaring of  
725 albatrosses. *Ibis* 147(1):1–10.
- 726 20. Bousquet GD, Triantafyllou MS, Slotine J–JE (2017) Optimal dynamic soaring  
727 consists of successive shallow arcs. *J R Soc Interface* 14(135):20170496.
- 728 21. Henderson DM (2010) Pterosaur body mass estimates from three–dimensional  
729 mathematical slicing. *J Vertebr Paleontol* 30(3):768–785.
- 730 22. Wilkinson MT, Unwin DM, Ellington CP (2006) High lift function of the pteroid  
731 bone and forewing of pterosaurs. *Proc R Soc B Biol Sci* 273(1582):119–126.
- 732 23. Taylor GK, Thomas ALR (2014) *Evolutionary biomechanics: selection,*  
733 *phylogeny, and constraint* (Oxford Series in Ecology and Evolution).
- 734 24. Wilkinson MT (2008) Three–dimensional geometry of a pterosaur wing  
735 skeleton, and its implications for aerial and terrestrial locomotion. *Zool J Linn*  
736 *Soc* 154(1):27–69.
- 737 25. Bennett SC (2003) Morphological evolution of the pectoral girdle of  
738 pterosaurs: myology and function. *Geol Soc London, Spec Publ* 217(1):191–  
739 215.
- 740 26. Norberg UM, Rayner JM V (1987) Ecological morphology and flight in bats  
741 (Mammalia; Chiroptera): wing adaptations, flight performance, foraging strategy  
742 and echolocation. *Philos Trans R Soc London B, Biol Sci* 316(1179):335–427.

- 743 27. Norberg UM (2012) *Vertebrate flight: mechanics, physiology, morphology,*  
744 *ecology and evolution* (Springer Science & Business Media).
- 745 28. Venditti C, Baker J, Benton MJ, Meade A, Humphries S (2020) 150 million  
746 years of sustained increase in pterosaur flight efficiency. *Nature* 587:83–86.
- 747 29. Witton MP, Naish D (2008) A reappraisal of azhdarchid pterosaur functional  
748 morphology and paleoecology. *PLoS One* 3(5):e2271.
- 749 30. Witton MP, Naish D (2013) Azhdarchid pterosaurs: water-trawling pelican  
750 mimics or “terrestrial stalkers”? *Acta Palaeontol Pol* 60(3):651–660.
- 751 31. Sachs G, Weimerskirch H (2018) Flight of frigatebirds inside clouds—energy  
752 gain, stability and control. *J Theor Biol* 448:9–16.
- 753 32. Swaminathan B, Mohan R (2018) On The Stability of Dynamic Soaring Orbits  
754 of UAVs. *2018 Atmospheric Flight Mechanics Conference*, p 2832.
- 755 33. Sachs G, Traugott J, Nesterova AP, Bonadonna F (2013) Experimental  
756 verification of dynamic soaring in albatrosses. *J Exp Biol* 216(22):4222–4232.
- 757 34. Harel R, Horvitz N, Nathan R (2016) Adult vultures outperform juveniles in  
758 challenging thermal soaring conditions. *Sci Rep* 6:1–8.
- 759 35. Sherub S, Bohrer G, Wikelski M, Weinzierl R (2016) Behavioural adaptations to  
760 flight into thin air. *Biol Lett* 12(10):20160432.
- 761 36. Williams HJ, et al. (2018) Vultures respond to challenges of near-ground  
762 thermal soaring by varying bank angle. *J Exp Biol* 221(23).
- 763 37. Shimatani IK, Yoda K, Katsumata N, Sato K (2012) Toward the quantification  
764 of a conceptual framework for movement ecology using circular statistical  
765 modeling. *PLoS One* 7(11):e50309.
- 766 38. Treep J, et al. (2015) Using high resolution GPS tracking data of bird flight for  
767 meteorological observations. *Bull Am Meteorol Soc* 97:951–961.
- 768 39. Weinzierl R, et al. (2016) Wind estimation based on thermal soaring of birds.  
769 *Ecol Evol* 6(24):8706–8718.
- 770 40. Yonehara Y, et al. (2016) Flight paths of seabirds soaring over the ocean  
771 surface enable measurement of fine-scale wind speed and direction. *Proc Natl*  
772 *Acad Sci* 113:9039–9044.
- 773 41. Goto Y, Yoda K, Sato K (2017) Asymmetry hidden in birds’ tracks reveals  
774 wind, heading, and orientation ability over the ocean. *Sci Adv* 3(9):e1700097.

- 775 42. Bramwell CD, Whitfield GR (1974) Biomechanics of pteranodon. *Philos Trans R*  
776 *Soc London B, Biol Sci* 267(890):503–581.
- 777 43. Brower JC (1983) The aerodynamics of Pteranodon and Nyctosaurus, two  
778 large pterosaurs from the Upper Cretaceous of Kansas. *J Vertebr Paleontol*  
779 3(2):84–124.
- 780 44. Buckley MP, Veron F (2016) Structure of the airflow above surface waves. *J*  
781 *Phys Oceanogr* 46(5):1377–1397.
- 782 45. Bird JJ, Langelaan JW, Montella C, Spletzer J, Grenestedt JL (2014) Closing  
783 the loop in dynamic soaring. *AIAA Guidance, Navigation, and Control*  
784 *Conference*, p 263.
- 785 46. Zhao YJ (2004) Optimal patterns of glider dynamic soaring. *Optim Control*  
786 *Appl methods* 25(2):67–89.
- 787 47. Shaffer SA, Weimerskirch H, Costa DP (2001) Functional significance of  
788 sexual dimorphism in wandering albatrosses, *Diomedea exulans*. *Funct Ecol*  
789 15(2):203–210.
- 790 48. Phillips RA, Silk JRD, Phalan B, Catry P, Croxall JP (2004) Seasonal sexual  
791 segregation in two *Thalassarche* albatross species: competitive exclusion,  
792 reproductive role specialization or foraging niche divergence? *Proc R Soc*  
793 *London Ser B Biol Sci* 271(1545):1283–1291.
- 794 49. Pennycuik CJ (1987) Flight of auks (*Alcidae*) and other northern seabirds  
795 compared with southern *Procellariiformes*: ornithodolite observations. *J Exp*  
796 *Biol* 128(1):335–347.
- 797
- 798
- 799
